## Retraction: *miR-135a* promotes gastric cancer progression and resistance to oxaliplatin

Lin-Hai Yan<sup>1</sup>, Zhi-Ning Chen<sup>2</sup>, Li-Li<sup>3</sup>, Jia Chen<sup>4</sup>, Wen-E Wei<sup>5</sup>, Xian-Wei Mo<sup>1</sup>, Yu-Zhou Qin<sup>1</sup>, Yuan Lin<sup>1</sup> and Jian-Si Chen<sup>1</sup>

<sup>1</sup>Department of Gastrointestinal Surgery, Affiliated Tumor Hospital of Guangxi Medical University, Nanning 530021, Guangxi Zhuang Autonomous Region, China

<sup>2</sup>Department of Pathology, Affiliated Tumor Hospital of Guangxi Medical University, Nanning 530021, Guangxi Zhuang Autonomous Region, China

<sup>3</sup>Department of Pharmacy, The People Hospital of Guangxi Zhuang Autonomous Region, Nanning 530021, Guangxi Zhuang Autonomous Region, China

<sup>4</sup>Department of Medical Image Center, Affiliated Tumor Hospital of Guangxi Medical University, Nanning 530021, Guangxi Zhuang Autonomous Region, China

<sup>5</sup>Department of Research, Affiliated Tumor Hospital of Guangxi Medical University, Nanning 530021, Guangxi Zhuang Autonomous Region, China

**Published:** March 31, 2026

**Copyright:** © 2026 Yan et al. This is an open access article distributed under the terms of the [Creative Commons Attribution License](#) (CC BY 4.0), which permits unrestricted use, distribution, and reproduction in any medium, provided the original author and source are credited.

**This article has been retracted:** Oncotarget has completed its investigation, and image forensic analysis confirmed extensive internal and external duplications across both main and supplemental figures. Internal duplications were identified in Figures 1A, 2A, 3A and 3E, 4D, 5C, 7E, 8B and 8D, and 9A, as well as in Supplementary Figures 1A and 3. External duplications were also found: Figure 4D duplicates Figure 2C in reference [1], Figure 8D duplicates Figure 6F in reference [2], Figure 6A–6C duplicates Figure 5B, 5D, 5F and Figure 5B duplicates Figure 4C in reference [3], respectively. Accordingly, the Editorial Decision was made to retract the publication. While one of the corresponding authors, Dr. Lin-Hai Yan, requested the retraction, we did not receive the formal retraction agreement with the signatures of all authors.

Original article: Oncotarget. 2016; 7:70699–70714. <https://doi.org/10.18632/oncotarget.12208>

### REFERENCES

1. Wei W, Li L, Wang X, Yan L, Cao W, Zhan Z, Zhang X, Yu H, Xie Y, Xiao Q. Overexpression of caudal type homeobox transcription factor 2 inhibits the growth of the MGC-803 human gastric cancer cell line in vivo. *Mol Med Rep.* 2015; 12:905–12. <https://doi.org/10.3892/mmr.2015.3413>. [PubMed]
2. Wang Q, Hardie RA, Hoy AJ, van Geldermalsen M, Gao D, Fazli L, Sadowski MC, Balaban S, Schreuder M, Nagarajah R, Wong JJ, Metierre C, Pinello N, et al. Targeting ASCT2-mediated glutamine uptake blocks prostate cancer growth and tumour development. *J Pathol.* 2015; 236:278–89. <https://doi.org/10.1002/path.4518>. [PubMed]
3. Xu X, Chen W, Miao R, Zhou Y, Wang Z, Zhang L, Wan Y, Dong Y, Qu K, Liu C. miR-34a induces cellular senescence via modulation of telomerase activity in human hepatocellular carcinoma by targeting FoxM1/c-Myc pathway. *Oncotarget.* 2015; 6:3988–4004. <https://doi.org/10.18632/oncotarget.2905>. [PubMed]
